# Supplementary material
Source: publisher site journal article supplement (https://www.dovepress.com/get_supplementary_file.php?f=309691.docx)
Supplement: Supplementary file 1 [file get_supplementary_file.php]

**Supplemental Material**

**Table S1**: List of code used for pain etiology

| **Diagnosis** | **Diagnosis Codes** |
| --- | --- |
| Post-laminectomy syndrome | 722.80-722.83, V45.89 |
| Complex regional pain syndrome | 337.20-337.22, 337.29, 355.71 |
| Causalgia | 354.4, 355.71 |
| Neuritis/radiculitis | 355.8, 355.9, 356.9, 720.2, 723.4, 724.3, 724.4, 729.2, 953.1, 953.2 |
| Degenerative disc disease | 721.0, 721.3, 721.41, 721.42, 722.0, 722.10, 722.4, 722.51, 722.52, 722.6, 722.73, 722.93, 724.00- 724.02, 737.30, 738.4 |
| Back pain | 723.1, 724.1, 724.2, 724.5 |
| Limb pain | 729.5 |
| Other chronic pain | 338.21, 338.28, 338.29, 338.4 |

**Table S2**: SCS procedure codes

| **Procedure** | **Codes** |
| --- | --- |
| Lead implantation | **CPT**: 63650, 63655  **ICD-9-CM**: 03.93  **ICD-10-PCS**: 00HU0MZ, 00HU3MZ, 00HU4MZ, 00HV0MZ, 00HV3MZ, 00HV4MZ  **HCPCS**: L8680, C1778, C1897 |
| Pulse generator implantation | **CPT**: 63685  **ICD-9-CM**: 86.94-86.98  **ICD-10-PCS**: 0JH60BZ, 0JH60CZ, 0JH60DZ, 0JH60EZ, 0JH60MZ, 0JH63BZ, 0JH63CZ, 0JH63DZ, 0JH63EZ, 0JH63MZ, 0JH70BZ', 0JH70CZ, 0JH70DZ, 0JH70EZ, 0JH70MZ, 0JH73BZ, 0JH73CZ, 0JH73DZ, 0JH73EZ, 0JH73MZ, 0JH80BZ, 0JH80CZ, 0JH80DZ, 0JH80EZ, 0JH80MZ, 0JH83BZ, 0JH83CZ, 0JH83DZ, 0JH83EZ, 0JH83MZ  **HCPCS**: L8685-L8688 |
| Lead removal | **CPT**: 63661, 63662  **ICD-9-CM**: 03.94  **ICD-10-PCS**: 00PV0MZ, 00PV3MZ, 00PV4MZ |
| Lead revision | **CPT**: 63663, 63664,  **ICD-9-CM**: 03.93  **ICD-10-PCS**: 00HU0MZ , 00HU3MZ, 00HU4MZ, 00HV0MZ, 00HV3MZ, 00HV4MZ |
| Pulse generator revision | **CPT**: 63685, 63688  **ICD-9-CM**: 86.94-86.98  **ICD-10-PCS**: 0JPT0MZ, 0JPT3MZ, 0JWT0MZ, 0JWT3MZ, 0JWTXMZ |
| Reprogramming | **CPT**: 95970, 95971, 95972, 95973 |

**Table S3**: MME equivalents used by type of opioid

| **Type of opioid** | **Morphine equivalent conversion factor per mg of opioid** |
| --- | --- |
| Propoxyphene | 0.23 |
| Codeine | 0.15 |
| Hydrocodone | 1.0 |
| Tramadol | 0.1 |
| Dihydrocodeine | 0.25 |
| Pentazocine | 0.37 |
| Morphine | 1.0 |
| Oxycodone | 1.5 |
| Hydromorphone | 4.0 |
| Meperidine hydrochloride | 0.1 |
| Oxymorphone | 3.0 |
| Levorphanol | 11.0 |
| Methadone | 3.0 |
| Fentanyl transdermal | (2400 * dose in mg/hr * 3 days per patch) |
| Fentanyl citrate transmucosal | 125 |
| Fentanyl spray | 180 |

<https://www.cms.gov/Medicare/Prescription-Drug-Coverage/PrescriptionDrugCovContra/Downloads/Oral-MME-CFs-vFeb-2018.pdf>

**Table S4**: Demographics of patients with and without HPM data
* All P-values for comparison between HPM and Not HPM groups are <0.05

|  | **Patients with HPM**  **(n=28,980)** | **Patients without HPM**  **(n=477,143)** | **P-value** |
| --- | --- | --- | --- |
| Age | 47.1±9.3 | 55.4±16.2 | 0.026 |
| Sex (Female) | 11035(38.1%) | 285763(59.9%) | <0.001 |
| History of Back pain | 19673(67.9%) | 320884(67.3%) | <0.001 |
| History of Degenerative disc disease | 10531(36.3%) | 210581(44.1%) | <0.001 |
| History of Limb pain | 9804(33.8%) | 184496(38.7%) | <0.001 |
| History of Neuritis/radiculitis | 9755(33.7%) | 186684(39.1%) | <0.001 |
| History of Other chronic pain | 1352(4.7%) | 41228(8.6%) | <0.001 |
| MME in year before MME 0 | 22378(77.2%) | 321175(67.3%) | <0.001 |
| MME <5 | 4021(13.9%) | 81505(17.1%) |  |
| MME 5-25 | 1351(4.7%) | 35775(7.5%) |  |
| MME >= 25 | 1230(4.2%) | 38688(8.1%) |  |

**Table S5**: Average daily morphine milligram equivalents (MME) in patients without and with HPM data.

|  | **Patients not on HPM**  **(n=477,143)** | | | **Patients on HPM**  **(n=28,980)** | | |
| --- | --- | --- | --- | --- | --- | --- |
| Average daily MME | <5 (n=309,756) | 5-25  (n=106,785) | ≥25  (n=60,602) | <5 (n=21,722) | 5-25 (n=5,276) | ≥25  (n=1,982) |
| MME in year before (median [IQR]) | 0.0 [0.0, 0.0] | 0.0 [0.0, 4.7] | 33.0 [1.8, 88.8] | 0.0 [0.0, 0.0] | 0.0 [0.0, 2.4] | 30.0 [0.9, 68.4] |
| MME in year after (median [IQR]) | 1.5 [0.8, 2.7] | 9.6 [6.7, 14.8] | 58.1 [36.1, 124.6] | 1.4 [0.8, 2.5] | 8.8 [6.4, 13.4] | 48.3 [32.7, 97.0] |

**Table S6**: Demographics by opioid dosage in the year after index prescription in de novo patients with HPM data. All p-values are computed relative to MME <5 per day group.

|  | **None**  **MME <5 per day**  **(n=13,729)** | **Low**  **MME in 5-25 per day**  **(n=2,232)** | **p-value** | **Moderate**  **MME ≥25 per day**  **(n=312)** | **p-value** |
| --- | --- | --- | --- | --- | --- |
| Disability absence in the year before (working days) | 6.0 | 8.9 | <0.001 | 10.8 | 0.002 |
| Age | 46.8±9.6 | 48.0±9.4 | <0.001 | 46.5±9.0 | 0.487 |
| Sex (Female) | 5179(37.7%) | 730(32.7%) | <0.001 | 101(32.4%) | 0.061 |
| History of  Back pain | 8727(63.6%) | 1509(67.6%) | <0.001 | 219(70.2%) | 0.019 |
| Degenerative disc disease | 3723(27.1%) | 921(41.3%) | <0.001 | 124(39.7%) | <0.001 |
| Limb pain | 4795(34.9%) | 693(31.0%) | <0.001 | 82(26.3%) | 0.002 |
| Neuritis/radiculitis | 3783(27.6%) | 882(39.5%) | <0.001 | 113(36.2%) | <0.001 |
| Other chronic pain | 279(2.0%) | 91(4.1%) | <0.001 | 29(9.3%) | <0.001 |

**Table S7**: Demographics by opioid dosage in the year after index prescription in continued use patients with HPM data. All p-values are computed relative to MME <5 per day group.

|  | **None**  **MME <5 per day (n=3,035)** | **Low**  **MME in 5-25 per day (n=2,032)** | **p-value** | **Moderate**  **MME ≥25 per day (n=1537)** | **p-value** |
| --- | --- | --- | --- | --- | --- |
| Disability absence in the year before (working days) | 20.0 | 24.7 | <0.001 | 21.3 | 0.332 |
| Age | 46.7±9.0 | 47.4±8.8 | 0.003 | 46.5±8.5 | 0.425 |
| Sex (Female) | 1242(40.9%) | 692(34.1%) | <0.001 | 462(30.1%) | <0.001 |
| History of  Back pain | 2191(72.2%) | 1586(78.1%) | <0.001 | 1185(77.1%) | <0.001 |
| Degenerative disc disease | 1227(40.4%) | 1157(56.9%) | <0.001 | 1022(66.5%) | <0.001 |
| Limb pain | 1017(33.5%) | 511(25.1%) | <0.001 | 317(20.6%) | <0.001 |
| Neuritis/radiculitis | 1149(37.9%) | 938(46.2%) | <0.001 | 753(49.0%) | <0.001 |
| Other chronic pain | 139(4.6%) | 215(10.6%) | <0.001 | 339(22.1%) | <0.001 |

**Figure S1:** Non-HPM Cohort Diagram.

Subjects meeting inclusion & exclusion criteria

581,151

Without HPM data

477,143 (82%)

**De-novo**

**240,097 (50%)**

**Continued Use**

**156,007 (33%)**

With linked HPM data

104,008 (18%)

Renewed onset

81,039 (17%)
